# Supplementary material for: The actinobacterial transcription factor RbpA binds to the principal sigma subunit of RNA polymerase
Source: PubMed Central journal article supplement — Nucleic Acids Res. 2013 Apr 19;41(11):5679–91. doi: 10.1093/nar/gkt277 (PMC3675491; doi:10.1093/nar/gkt277), 2013-04-19
Supplement: supp_gkt277_nar-00514-v-2013-File009.pdf [file supp_gkt277_nar-00514-v-2013-File009.pdf]

Supplementary Data for:

**The actinobacterial transcription factor RbpA binds to the principal sigma subunit of RNA polymerase**

Aline Tabib-Salazar, Bing Liu, Philip Doughty, Richard A. Lewis, Somadri Ghosh, Marie-Laure Parsy, Peter Simpson, Kathleen O'Dwyer, Steve J. Matthews & Mark S. Paget

**Table S1. Bacterial strains and plasmids used in this study**

| Strain or plasmid                 | Relevant genotype/comments                                                                                                                                        | Source/reference |
|-----------------------------------|-------------------------------------------------------------------------------------------------------------------------------------------------------------------|------------------|
| <b>Strains</b>                    |                                                                                                                                                                   |                  |
| <b><i>S. coelicolor</i> A3(2)</b> |                                                                                                                                                                   |                  |
| M145                              | Plasmid free derivative of wild-type                                                                                                                              |                  |
| J1915                             | M145 $\Delta glkA119$                                                                                                                                             | (1)              |
| S101                              | J1915 $\Delta rbpA::hyg$ (Hyg <sup>R</sup> )                                                                                                                      | (2)              |
| S129                              | J1981 $\Delta rbpA::hyg$ (Hyg <sup>R</sup> )                                                                                                                      | This work        |
| J1981                             | M145 <i>rpoC::his</i>                                                                                                                                             | (3)              |
| <b><i>E. coli</i></b>             |                                                                                                                                                                   |                  |
| ET12567 (pUZ8002)                 | <i>dam, dcm, hsdM</i> . pUZ8002 is a non-transmissible derivative of RK2 (Cm <sup>R</sup> , Km <sup>R</sup> )                                                     | (4)              |
| BL21 $\lambda$ DE3 (pLysS)        | <i>E. coli</i> B F <sup>-</sup> <i>ompT hsdS(r<sub>B</sub><sup>-</sup>m<sub>B</sub><sup>-</sup>) dcm gal <math>\lambda</math>(DE3) endA Hte (Tet<sup>R</sup>)</i> | (5)              |
| BTH101                            | <i>cya-99</i> derivatives of (Spc <sup>R</sup> )                                                                                                                  |                  |
| <b>Plasmids</b>                   |                                                                                                                                                                   |                  |
| pMT3000                           | <i>E. coli</i> cloning vector; <i>ori</i> pUC18 (Amp <sup>R</sup> )                                                                                               | (6)              |
| pBluescript II SK <sup>+</sup>    | <i>E. coli</i> cloning vector; <i>ori</i> pUC18 (Amp <sup>R</sup> )                                                                                               | (7)              |
| pKT25                             | Two-hybrid vector; T25 fragment of <i>B. pertussis</i> CyaA for N-terminal fusions (Km <sup>R</sup> )                                                             | (8)              |
| pUT18                             | Two-hybrid vector; T18 fragment of <i>B. pertussis</i> CyaA for C-terminal fusions (Amp <sup>R</sup> )                                                            | (8)              |
| pSET152                           | Integrative cloning vector; <i>ori</i> pUC18, <i>oriT</i> RK2, <i>int</i> $\phi$ C31, <i>attP</i> $\phi$ C31 (Apr <sup>R</sup> ).                                 | (9)              |
| pSET $\Omega$                     | pSET152 derivative (Spc <sup>R</sup> )                                                                                                                            | (10)             |
| pIJ6902                           | pSET152-based expression vector, <i>tipAp</i> (Apr <sup>R</sup> Thio <sup>R</sup> ).                                                                              | (11)             |
| pET15b                            | <i>E. coli</i> expression vector (His <sub>6</sub> -tagged; Amp <sup>R</sup> )                                                                                    | Novagen          |
| pET20b                            | <i>E. coli</i> expression vector (native; Amp <sup>R</sup> )                                                                                                      | Novagen          |
| pSX190                            | pSET152 containing C-terminally 3xFLAG-tagged <i>rbpA</i> .                                                                                                       | This study       |
| pSX233                            | pET20b containing <i>S. coelicolor rbpA</i>                                                                                                                       | (2)              |
| pSX500                            | pET20b containing <i>M. tuberculosis rbpA</i>                                                                                                                     | This study       |
| pSX505                            | pET15b containing <i>S. coelicolor rbpA</i> residues 1-75                                                                                                         | This study       |
| pSX510                            | pET15b containing <i>S. coelicolor rbpA</i> (R89A/R90A)                                                                                                           | This study       |
| pSX512                            | pMT3000:: <i>rbpA</i> (2) in which an <i>NdeI</i> site has been engineered at the start codon. Includes promoter and terminator regions of <i>rbpA</i> .          | This study       |
| pSX528                            | pIJ6902 containing <i>rbpA</i> as an <i>NdeI</i> - <i>Bam</i> HI fragment from pSX233.                                                                            | This study       |
| pSX530                            | pSET $\Omega$ containing at the <i>Bam</i> HI site a <i>Bgl</i> II-fragment isolated from pMT3000:: <i>rbpA</i> .                                                 | This study       |

**Table S2. Oligonucleotides used in this study**

| Construction/Oligo nucleotide name                                                                  | Primer sequence (5' to 3')<br>(restriction sites indicated in bold)                                                    | Amino acid coordinates |
|-----------------------------------------------------------------------------------------------------|------------------------------------------------------------------------------------------------------------------------|------------------------|
| (A) Plasmid constructs                                                                              |                                                                                                                        |                        |
| <i>rbpA_H3_rev</i>                                                                                  | CCC <span style="font-weight: bold;">G</span> CTAAAGCTTCGCACTCTTGCG                                                    |                        |
| (B) Bacterial Two Hybrid Analysis                                                                   |                                                                                                                        |                        |
| <i>S. coelicolor</i> sigma factor fusions to T25 in pKT25 and <i>rbpA</i> fusions to T18 in pUT18   |                                                                                                                        |                        |
| <i>T25-hrdB</i> ( $\sigma_2$ - $\sigma_4$ )                                                         | F- GGTCTAGAGACCGCCGACCCGGTCAAGGAC<br>R- GGG <span style="font-weight: bold;">GAATTC</span> CTAGTCGAGGTAGTCGCGCAG       | 211-511                |
| <i>T25-hrdB</i> ( $\sigma_{1.1}$ - $\sigma_2$ )                                                     | F- GGTCTAGAGGTGTGCGCCAGCACATCCCGTAC<br>R- GGG <span style="font-weight: bold;">GAATTC</span> CTAGCGCGCTGGTCGGCCATCGC   | 1-347                  |
| <i>T25-hrdB</i> ( $\sigma_2$ )                                                                      | F- GGTCTAGAGACCGCCGACCCGGTCAAGGAC<br>R- GGG <span style="font-weight: bold;">GAATTC</span> CTAGCGCGCTGGTCGGCCATCGC     | 211-347                |
| <i>T25-hrdB</i> ( $\sigma_3$ - $\sigma_4$ )                                                         | F- GGTCTAGAGAGCTTCACACTGCTGCAGGAGC<br>R- GGG <span style="font-weight: bold;">GAATTC</span> CTAGTCGAGGTAGTCGCGCAG      | 348-511                |
| <i>T25-hrdB</i> ( $\sigma_4$ )                                                                      | F- GGTCTAGAGAGCTTCACACTGCTGCAGGAGC<br>R- GGG <span style="font-weight: bold;">GAATTC</span> CTAGTCGAGGTAGTCGCGCAG      | 435-511                |
| <i>T25-hrdA</i> ( $\sigma_2$ - $\sigma_4$ )                                                         | F- GGTCTAGAGTCCCTCCGACCTGTTCCGGCAG<br>R- GGG <span style="font-weight: bold;">GAATTC</span> TCAGTCCAGGTAGCCCCTCAG      | 96-396                 |
| <i>T25-hrdC</i> ( $\sigma_2$ - $\sigma_4$ )                                                         | F- GGTCTAGAGGAACCCGACCTGCTCGGC<br>R- GGG <span style="font-weight: bold;">GAATTC</span> TCAGCTCGCCCAGTCCAGC            | 35-339                 |
| <i>T25-hrdD</i> ( $\sigma_2$ - $\sigma_4$ )                                                         | F- GGTCTAGAGGACCGCATCTGGTCGGCATG<br>R- GGG <span style="font-weight: bold;">GAATTC</span> TCAGGCCGCCCTCGAAGC           | 32-332                 |
| <i>T25-sigB</i>                                                                                     | F- GGTCTAGAGATGACGACGACCGCGCGAGCCAC<br>R- GGG <span style="font-weight: bold;">GAATTC</span> TCAGGTGGTGTGAGCATGCCTTCC  | 1-281                  |
| <i>T25-sigR</i>                                                                                     | F- GGTCTAGAGGTGGTCCGGTCACTGGGAC<br>R- GGG <span style="font-weight: bold;">GAATTC</span> CATGACCCCGAGCCTTTCG           | 1-227                  |
| <i>T25-sigE</i>                                                                                     | F- GGTCTAGAGATGGGCGAGGTGCTCGAGTTCG<br>R- GGG <span style="font-weight: bold;">GAATTC</span> TCAGGCCCGCAACGCTCC         | 1-177                  |
| <i>T25-whoG</i>                                                                                     | F- GGTCTAGAGATGCCCCAGCACACCTCCG<br>R- GGG <span style="font-weight: bold;">GAATTC</span> TCAGCGGCCGAAACCCGCAAG         | 1-280                  |
| <i>rbpA-T18</i>                                                                                     | F- GGGGATCCGATGAGTGAGCGAGCTCTTCG<br>R- GGG <span style="font-weight: bold;">GAATTC</span> CCCCGCACTCTTGCGGCTGTC        | 1-124                  |
| <i>rbpA</i> <sup>1-72</sup> -T18                                                                    | F- GG <span style="font-weight: bold;">GAATTC</span> CCCCAGCCGCCAGC<br>R- CTCAGGGCCGTCGCCGTCAAC                        | 1-72                   |
| <i>rbpA</i> <sup>1-90</sup> -T18                                                                    | F- GG <span style="font-weight: bold;">GAATTC</span> CCCCAGCCGCCAGC<br>R- GGTGCGTCGCTCCATCAGCATGTC                     | 1-90                   |
| <i>rbpA</i> <sup>73-124</sup> -T18                                                                  | F- GGGGATCCGGAGAAGAAGGCCAAGCCCG<br>R- GGG <span style="font-weight: bold;">GAATTC</span> CCCCGCACTCTTGCGGCTGTC         | 73-124                 |
| <i>M. tuberculosis</i> sigma factor fusions to T25 in pKT25 and <i>rbpA</i> fusions to T18 in pUT18 |                                                                                                                        |                        |
| <i>T25-sigA</i>                                                                                     | F- GGTCTAGAGGTGGCAGCGACCAAAGCAAG<br>R- GGG <span style="font-weight: bold;">GAATTC</span> TCAGTCCAGGTAGTCGCG CAG       | 1-528                  |
| <i>T25-sigA</i> ( $\sigma_2$ )                                                                      | F- GGTCTAGAGTCCGCCGACTCGGTTCCGCGCC<br>R- GGG <span style="font-weight: bold;">GAATTC</span> TCAGCGGGCCTGGTCGGCCATGGCGC | 224-364                |
| <i>T25-sigB</i>                                                                                     | F- CCTCTAGAGGCCGATGCACCCACAAGGGCCA<br>R- CCG <span style="font-weight: bold;">AATTC</span> CTGGCTCAGGATGTCCAGCT        | 1-323                  |
| <i>rbpA-T18</i>                                                                                     | F- GGGGATCCGATGGCTGATCGTGTCTGAG<br>R- GG <span style="font-weight: bold;">GAATTC</span> CCGCCGCGCCGACGTGACCGAATG       | 1-111                  |
| (C) Protein overexpression                                                                          |                                                                                                                        |                        |
| <i>S. coelicolor</i> proteins                                                                       |                                                                                                                        |                        |
| <i>hrdB</i> ( $\sigma_2$ - $\sigma_4$ )                                                             | F- GGCATATGACCGCCGACCCGGTCAAGG<br>R- GGAGATCTCTAGTCGAGGTAGTCGCGCAGC                                                    | 211-511                |
| <i>hrdB</i> ( $\sigma_2$ )                                                                          | F- GGCATATGACCGCCGACCCGGTCAAGG<br>R- GGAGATCTTCAGCGCGCTGGTCGGCCATC                                                     | 211-347                |
| <i>hrdB</i> ( $\sigma_3$ - $\sigma_4$ )                                                             | F- GGCATATGACCATCCGTATCCCGGTGCAC<br>R- GGAGATCTCTAGTCGAGGTAGTCGCGCAGC                                                  | 348-511                |
| <i>hrdB</i> ( $\sigma_4$ )                                                                          | F- GGCATATGAGCTTCACACTGCTGCAGGAGC<br>R- GGAGATCTCTAGTCGAGGTAGTCGCGCAGC                                                 | 435-511                |
| <i>M. tuberculosis</i> proteins                                                                     |                                                                                                                        |                        |
| <i>rbpA</i>                                                                                         | F- GGCATATGGCTGATCGTGTCTGAGG                                                                                           | 1-111                  |

*sigA* ( $\sigma_2$ ) R- CCGGATCCCGGGTCAGCCGCGCCGACGTG  
 F- GGCATATGTCCGCCGACTCGGTTCCGCGCC 224-364  
 R- CCGGATCCCCATCAGCGGGCCTGGTCGGCCATGGC

(D) Primers for *in vitro* transcription templates (distance from reverse primer to transcription start site indicated in parentheses)

*atpI* (187 nt) F CGCAATACCAGACAAGTTGC  
 R GCCGCGGGCAGGCAGCCTG  
*relAp1* (215 nt) F GGTCTGAACCACGCGAACC  
 R TTGGGGCGCGGCTGCTGCTC  
*sacAp* (200 nt) F GGCGTAGTGATGGCCGCACG  
 R GTCGCCACCTGCAGTGTGC  
*Tuf3p* (181 nt) F CCGCGCGGGAGGCGCTGCGG  
 R AAGCCTCGTGGCGGTGGTGG  
*rpIJp* (46 nt) F GGGAATTCGCGCCCGCCGCTCCGGTCGCCG  
 R GGAAGCTTGTCTCTTTGAAACACACGGCAACG

(E) Primers for ChIP-qPCR of *rpIJ* promoter region

*rpIJp\_1* F GCCGAGGCCGAGATGCAGAT  
 R GCCCCGATGTACATGGCCT  
*rpIJp\_2* F GTGAAGGTCACCGCCCTCC  
 R AAGCGTACGTGAACGGGGCA  
*rpIJp\_3* F CAGTCTCCTTCGGGTCCGC  
 R TGTCCGTCAGCTCGGCAACC  
*rpIJp\_4* F AAGGGCGGTGCCTTGACGG  
 R TTGAAGGCACCCGCCAGCTT

**Table S3. NMR and Refinement statistics**

| NMR and Refinement statistics                |                             |                           |  |
|----------------------------------------------|-----------------------------|---------------------------|--|
|                                              | <i>M. tuberculosis</i> RbpA | <i>S. coelicolor</i> RbpA |  |
| <b>NMR Distance and Dihedral Constraints</b> |                             |                           |  |
| Distance constraints                         |                             |                           |  |
| Total NOE                                    | 484                         | 474                       |  |
| Intraresidue                                 | 236                         | 206                       |  |
| Interresidue                                 | 248                         | 268                       |  |
| Sequential ( $ i-j =1$ )                     | 101                         | 74                        |  |
| Medium range ( $ i-j <4$ )                   | 9                           | 14                        |  |
| Long range ( $ i-j >5$ )                     | 131                         | 158                       |  |
| Total Dihedral angle Restraints              | 82                          | 82                        |  |
| $\phi$                                       | 41                          | 41                        |  |
| $\psi$                                       | 41                          | 41                        |  |
| <b>Structural Statistics</b>                 |                             |                           |  |
| Violations (mean and SD)                     |                             |                           |  |
| Distance constraints (Å)                     | 0.024 ± 0.007               | 0.026 ± 0.004             |  |
| Dihedral angle constraints (°)               | 0.19 ± 0.045                | 0.19 ± 0.056              |  |
| Maximum dihedral angle violation (°)         | 0.25                        | 0.65                      |  |
| Maximum distance constraint violation (Å)    | 0.167                       | 0.26                      |  |
| Deviations from idealized geometry           |                             |                           |  |
| Bond length (Å)                              | 0.002 ± 0.000               | 0.003 ± 0.000             |  |
| Bond angle (°)                               | 0.46 ± 0.007                | 0.46 ± 0.006              |  |
| Improper (°)                                 | 0.24 ± 0.01                 | 0.22 ± 0.01               |  |
| Average Pairwise rmsd <sup>a</sup> (Å)       |                             |                           |  |
| Heavy                                        | 0.884                       | 0.942                     |  |
| Backbone                                     | 0.377                       | 0.517                     |  |

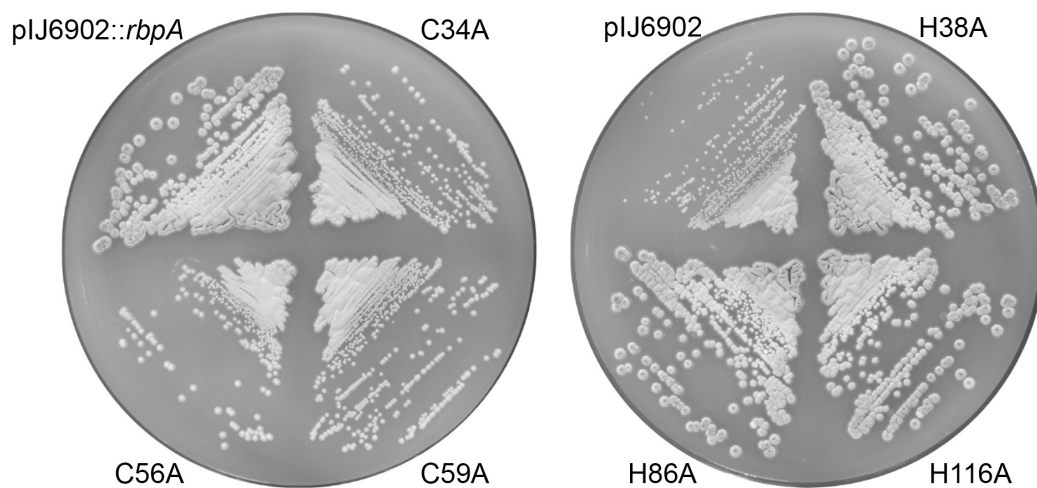

**Figure S1.** Mutational analysis of putative zinc ligands in *S. coelicolor* RbpA. Following site-directed mutagenesis *rbpA*, mutant genes were isolated as promoterless *NdeI-BamHI* fragments and subcloned into pIJ6902, thereby placing them under control of the thiostrepton inducible promoter *tipAp*. The control plasmid pIJ6902::*rbpA* is equivalent to pSX528. Plasmids were introduced into *S. coelicolor* S101 ( $\Delta$ *rbpA*::*hyg*) by conjugation and streaked to MS-agar plates plus 25  $\mu$ g/ml thiostrepton. Plates were photographed after incubation for 4 days at 30°C. All strains grew poorly and formed small colonies in the absence of thiostrepton.

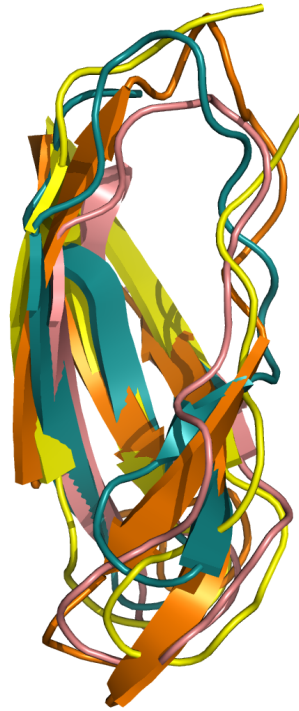

**Figure S2.** Overlay of the RCD domain of *S. coelicolor* RbpA with homologous domains from the following structures: Mini-chromosome maintenance complex, green, RMSD of 2.6Å over 36 equivalent C $\alpha$  atoms (12); ribosomal protein L27, orange, RMSD of 2.3Å over 38 equivalent C $\alpha$  atoms(13) polypeptide chain release factor, yellow, RMSD of 2.5Å over 39 equivalent C $\alpha$  atoms (14).

## References

1. Kelemen, G.H., Plaskitt, K.A., Lewis, C.G., Findlay, K.C. and Buttner, M.J. (1995) Deletion of DNA lying close to the *glkA* locus induces ectopic sporulation in *Streptomyces coelicolor* A3(2). *Mol Microbiol*, **17**, 221-230.
2. Newell, K.V., Thomas, D.P., Brekasis, D. and Paget, M.S. (2006) The RNA polymerase-binding protein RbpA confers basal levels of rifampicin resistance on *Streptomyces coelicolor*. *Mol Microbiol*, **60**, 687-696.
3. Babcock, M.J., Buttner, M.J., Keler, C.H., Clarke, B.R., Morris, R.A., Lewis, C.G. and Brawner, M.E. (1997) Characterization of the *rpoC* gene of *Streptomyces coelicolor* A3(2) and its use to develop a simple and rapid method for the purification of RNA polymerase. *Gene*, **196**, 31-42.
4. Paget, M.S., Chamberlin, L., Atrih, A., Foster, S.J. and Buttner, M.J. (1999) Evidence that the extracytoplasmic function sigma factor sigmaE is required for normal cell wall structure in *Streptomyces coelicolor* A3(2). *J Bacteriol*, **181**, 204-211.
5. Studier, F.W. and Moffatt, B.A. (1986) Use of bacteriophage T7 RNA polymerase to direct selective high-level expression of cloned genes. *J Mol Biol*, **189**, 113-130.
6. Paget, M.S., Hintermann, G. and Smith, C.P. (1994) Construction and application of streptomycete promoter probe vectors which employ the *Streptomyces glaucescens* tyrosinase-encoding gene as reporter. *Gene*, **146**, 105-110.
7. Alting-Mees, M.A. and Short, J.M. (1989) pBluescript II: gene mapping vectors. *Nucleic Acids Res*, **17**, 9494.
8. Karimova, G., Ullmann, A. and Ladant, D. (2001) Protein-protein interaction between *Bacillus stearothermophilus* tyrosyl-tRNA synthetase subdomains revealed by a bacterial two-hybrid system. *J Mol Microbiol Biotechnol*, **3**, 73-82.
9. Bierman, M., Logan, R., O'Brien, K., Seno, E.T., Rao, R.N. and Schonher, B.E. (1992) Plasmid cloning vectors for the conjugal transfer of DNA from *Escherichia coli* to *Streptomyces* spp. *Gene*, **116**, 43-49.
10. O'Connor, T.J., Kanellis, P. and Nodwell, J.R. (2002) The *ramC* gene is required for morphogenesis in *Streptomyces coelicolor* and expressed in a cell type-specific manner under the direct control of RamR. *Mol Microbiol*, **45**, 45-57.
11. Huang, J., Shi, J., Molle, V., Sohlberg, B., Weaver, D., Bibb, M.J., Karoonuthaisiri, N., Lih, C.J., Kao, C.M., Buttner, M.J. *et al.* (2005) Cross-regulation among disparate antibiotic biosynthetic pathways of *Streptomyces coelicolor*. *Mol Microbiol*, **58**, 1276-1287.
12. Fletcher, R.J., Bishop, B.E., Leon, R.P., Sclafani, R.A., Ogata, C.M. and Chen, X.S. (2003) The structure and function of MCM from archaeal *M. Thermoautotrophicum*. *Nat Struct Biol*, **10**, 160-167.
13. Wang, H., Takemoto, C.H., Murayama, K., Sakai, H., Tatsuguchi, A., Terada, T., Shirouzu, M., Kuramitsu, S. and Yokoyama, S. (2004) Crystal structure of

ribosomal protein L27 from *Thermus thermophilus* HB8. *Protein Sci*, **13**, 2806-2810.

14. Mantsyzov, A.B., Ivanova, E.V., Birdsall, B., Alkalaeva, E.Z., Kryuchkova, P.N., Kelly, G., Frolova, L.Y. and Polshakov, V.I. (2010) NMR solution structure and function of the C-terminal domain of eukaryotic class 1 polypeptide chain release factor. *FEBS J*, **277**, 2611-2627.
